# Supplementary material
Source: PubMed Central journal article supplement (PMC2104767)
Supplement: thorax_thx.2005.054924_2.pdf [file thorax_thx.2005.054924_2.pdf]

**Table S1 Clinicodemographic characteristics of patients by age group**

|                                            | Age <65 (n=1798) |           | Age 65–74 (n=2683) |           | Age 75–84 (n=2472) |           | Age 85+ (n=561) |         |
|--------------------------------------------|------------------|-----------|--------------------|-----------|--------------------|-----------|-----------------|---------|
|                                            | [median age 59]  |           | [median age 70]    |           | [median age 79]    |           | [median age 87] |         |
|                                            | %                | n         | %                  | n         | %                  | n         | %               | n       |
|                                            |                  |           |                    |           |                    |           |                 |         |
| Male                                       | 50               | 895       | 53                 | 1409      | 54                 | 1330      | 54              | 304     |
| Living alone                               | 30               | 500/1676  | 36                 | 914/2516  | 45                 | 1047/2347 | 53              | 276/522 |
| Living in own home without social care     | 83               | 1197/1440 | 74                 | 1612/2168 | 61                 | 1264/2083 | 46              | 225/493 |
| Living in own home with social care        | 10               | 144/1440  | 15                 | 332/2168  | 22                 | 458/2083  | 27              | 131/493 |
| Other (sheltered 50%; institutional 36%)   | 7                | 99/1440   | 10                 | 224/2168  | 17                 | 361/2083  | 28              | 137/493 |
| Performance status                         |                  |           |                    |           |                    |           |                 |         |
| Normal activity/strenuous activity limited | 45               | 709/1590  | 30                 | 716/2359  | 24                 | 531/2182  | 18              | 87/483  |
| Limited activity but self care             | 40               | 641/1590  | 48                 | 1128/2359 | 48                 | 1056/2182 | 44              | 213/483 |

|                                      | Age <65 (n=1798) |           | Age 65–74 (n=2683) |           | Age 75–84 (n=2472) |          | Age 85+ (n=561) |         |
|--------------------------------------|------------------|-----------|--------------------|-----------|--------------------|----------|-----------------|---------|
|                                      | [median age 59]  |           | [median age 70]    |           | [median age 79]    |          | [median age 87] |         |
|                                      | %                | n         | %                  | n         | %                  | n        | %               | n       |
| Limited self care/bed or chair bound | 15               | 240/1590  | 22                 | 515/2359  | 27                 | 595/2182 | 38              | 183/483 |
| Documented co-morbidity              |                  |           |                    |           |                    |          |                 |         |
| Heart disease                        | 25               | 455       | 39                 | 1041      | 44                 | 1082     | 46              | 259     |
| Stroke                               | 3                | 60        | 5                  | 145       | 7                  | 180      | 7               | 41      |
| Other chest problems                 | 11               | 203       | 11                 | 294       | 11                 | 259      | 9               | 53      |
| Diabetes                             | 8                | 147       | 10                 | 272       | 11                 | 267      | 10              | 55      |
| Locomotor problems                   | 10               | 177       | 12                 | 316       | 14                 | 338      | 15              | 83      |
| Visual impairment                    | 1                | 23        | 2                  | 65        | 4                  | 87       | 8               | 43      |
| None of the above                    | 55               | 984       | 42                 | 1117      | 37                 | 911      | 36              | 199     |
| One of the above                     | 34               | 606       | 41                 | 1103      | 41                 | 1018     | 41              | 229     |
| Two or more of the above             | 12               | 208       | 17                 | 463       | 22                 | 543      | 24              | 133     |
| Current smoker                       | 60               | 1046/1747 | 44                 | 1155/2594 | 29                 | 671/2313 | 17              | 83/491  |

|                                                      | Age <65 (n=1798) |           | Age 65–74 (n=2683) |           | Age 75–84 (n=2472) |           | Age 85+ (n=561) |         |
|------------------------------------------------------|------------------|-----------|--------------------|-----------|--------------------|-----------|-----------------|---------|
|                                                      | [median age 59]  |           | [median age 70]    |           | [median age 79]    |           | [median age 87] |         |
|                                                      | %                | n         | %                  | n         | %                  | n         | %               | n       |
| Ex-smoker                                            | 38               | 664/1747  | 53                 | 1366/2594 | 66                 | 1537/2313 | 71              | 351/491 |
| Lifelong non-smoker                                  | 2                | 37/1747   | 3                  | 73/2594   | 5                  | 105/2313  | 12              | 57/491  |
| 40+ pack years of smoking<br>(ex/current)            | 57               | 508/898   | 63                 | 750/1196  | 61                 | 578/951   | 55              | 84/153  |
| Previous COPD admission or early<br>discharge scheme | 63               | 1080/1708 | 67                 | 1721/2554 | 66                 | 1513/2302 | 64              | 335/520 |

$\chi^2$  test with age group: all  $p < 0.001$  except for sex ( $p = 0.05$ ), other chest problems ( $p = 0.61$ ), diabetes ( $p = 0.04$ ), pack years ( $p = 0.02$ ), and previous COPD admission ( $p = 0.04$ ).
